# Supplementary material
Source: PubMed Central journal article supplement (PMC3006653)
Supplement: NIHMS246590-supplement-01.pdf [file NIHMS246590-supplement-01.pdf]

**Supplementary Figure 1. Deletion of IL-13R $\alpha$ 2, suppresses proinflammatory gene expression and protects *il10*<sup>-/-</sup> mice from piroxicam-induced colitis.** Mice were fed piroxicam infused food for 14 days, with colitis assessed on day 14. Five animals per group were used with 1 of 2 experiments shown. Mean $\pm$ SEM are shown with p<0.05 considered statistically significant. RNA was extracted from the colon of mice, 14 days post piroxicam exposure. Relative to HPRT, the following gene transcripts were quantified:

il17a

il17f

ifn $\gamma$ tnf $\alpha$ 

cxcl9 (mig)

inos

mmp2

**Supplementary Figure 2. IL-13R $\alpha$ 2 restricts IL-13-mediated gene expression in the caecum of *T. muris* infected *il10*<sup>-/-</sup> mice.** Mice were infected with 200 *T. muris* eggs with gene expression in the caecum analyzed at day 15. Five animals per group were used with 1 of 3 experiments shown. Mean $\pm$ SEM are shown with p<0.05 considered statistically significant. RNA was extracted from the caecum of mice, 15 days post infection.

il13

il10

ccl11 (eotaxin)

cxcl10 (IP-10)

retln $\alpha$  (Fizz-1)

**Supplementary Figure 3. In vitro polarized Th1 cells do not respond to IL-13.**

FACS-purified naïve CD4<sup>+</sup>CD62L<sup>hi</sup>CD44<sup>lo</sup> T cells were stimulated under Th1 conditions. One of 4 experiments is shown. Mean $\pm$ SEM are shown with p<0.05 considered statistically significant.

A- Intracellular cytokine staining of IFN $\gamma$  and IL-17A from Th1 polarized cells using

IL-13-responsive (IL-13R $\alpha$ 1<sup>+/+</sup>) and unresponsive (IL-13R $\alpha$ 1<sup>-/-</sup>) cells.

B- Th1-polarized cells cultured with rIL-13. IFN $\gamma$  secretion measured by ELISA.
