# Supplementary material
Source: PubMed Central journal article supplement (PMC3006653)

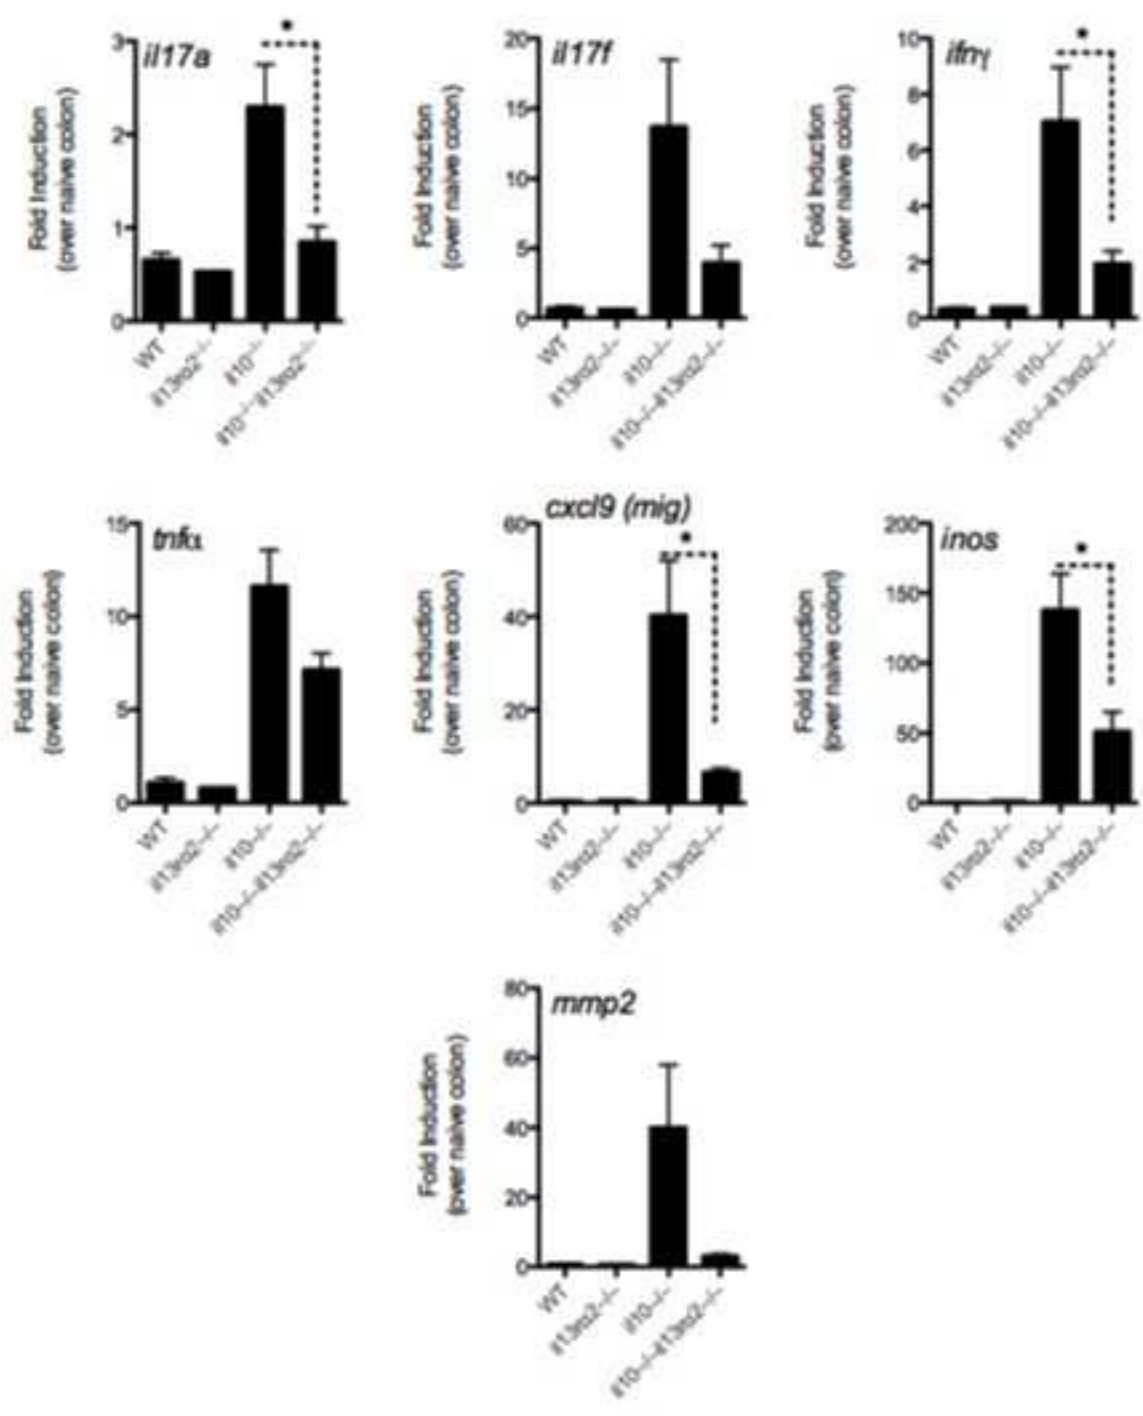

Supplement: NIHMS246590-supplement-02.pdf [file NIHMS246590-supplement-02.pdf]

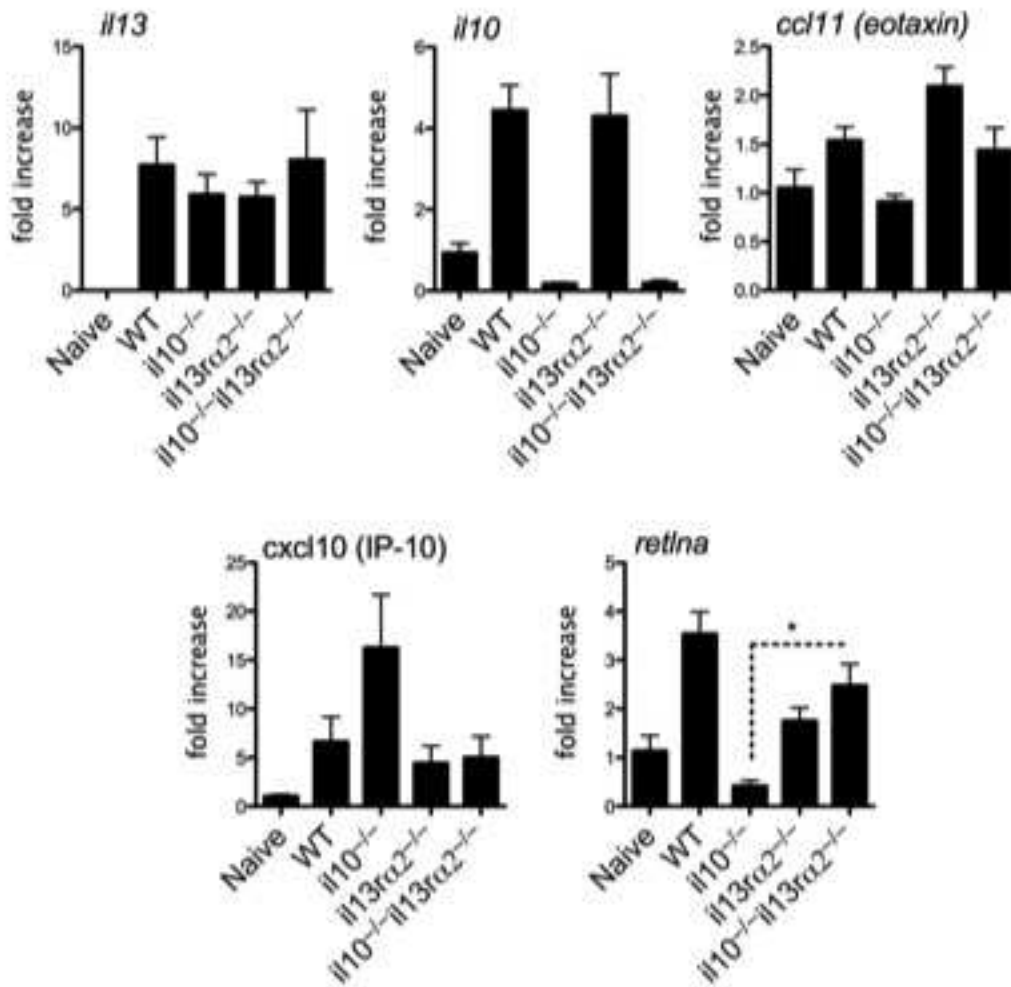

Supplement: NIHMS246590-supplement-03.pdf [file NIHMS246590-supplement-03.pdf]

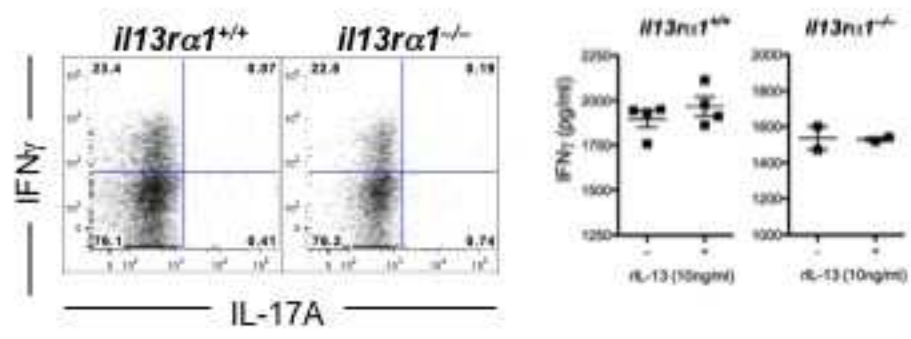

Supplement: NIHMS246590-supplement-04.pdf [file NIHMS246590-supplement-04.pdf]
